# Supplementary material for: Circulatory shear flow alters the viability and proliferation of circulating colon cancer cells
Source: PubMed Central journal article supplement (PMC4891768; doi:10.1038/srep27073), 2016-06-03
Supplement: srep27073-s1.pdf [file srep27073-s1.pdf]

## Support Information

# Circulatory shear flow alters the viability and proliferation of circulating colon cancer cells

Rong Fan,<sup>a</sup> Travis Emery,<sup>b</sup> Yongguo Zhang,<sup>c</sup> Yuxuan Xia,<sup>d</sup> Jun Sun,<sup>c\*</sup> Jiandi Wan<sup>a\*</sup>

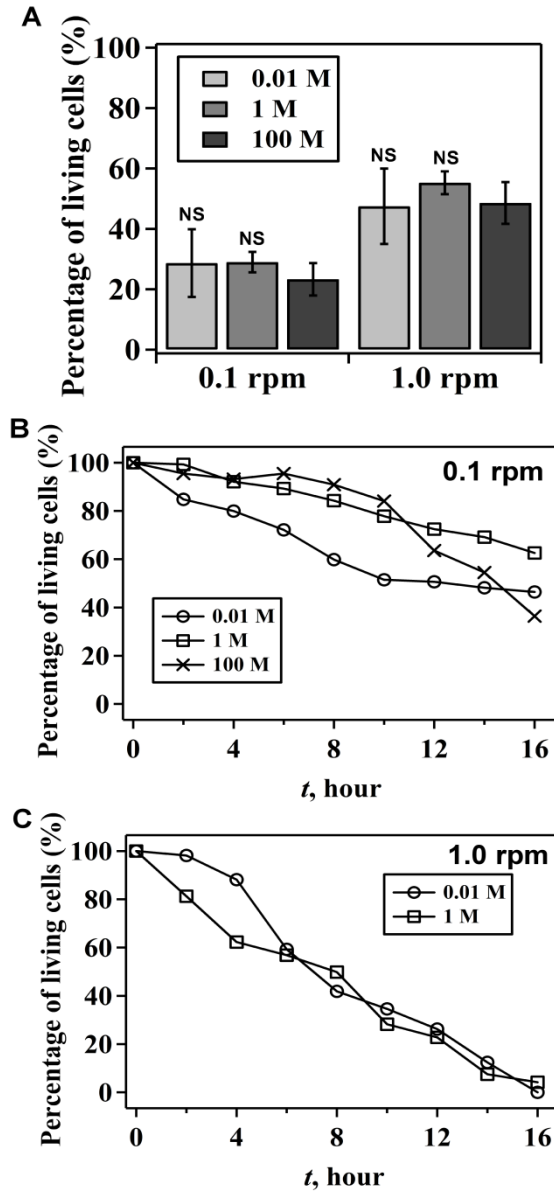

**Figure S1.** Effect of concentration of circulation cells on cell viability and proliferation. (A) Immediate cell viability after cells circulated for 20 h with an initial cell concentration of 0.01, 1, or 100 M cells/ml. The circulation speeds were 0.1 and 1.0 revolution per minute (rpm). (B) and (C) are proliferation of cells survived from 20 h circulation at 0.1 rpm and 1.0 rpm respectively. The initial cell concentration was 0.01, 1, or 100 M cells/ml. Note the different proliferation of cells in (B) at different initial cell concentrations. \*\*  $P < 0.01$  and \*  $P < 0.05$  were calculated based on paired student  $t$ -test analysis. NS = non-significant.

Table S1. Calculation of average wall shear stress in the microfluidic system

| Calculating parameter                                                     | Value                                       |
|---------------------------------------------------------------------------|---------------------------------------------|
| Viscosity ( $\mu$ )                                                       | $1 \times 10^{-3} \text{Pa} \cdot \text{s}$ |
| Volume flow rate ( $Q$ ) for 0.1 rpm                                      | $2.5 \times 10^{-10} \text{m}^3/\text{min}$ |
| Volume flow rate ( $Q$ ) for 0.5 rpm                                      | $1.9 \times 10^{-9} \text{m}^3/\text{min}$  |
| Volume flow rate ( $Q$ ) for 1.0 rpm                                      | $4.3 \times 10^{-9} \text{m}^3/\text{min}$  |
| Width of the constriction channel ( $w$ )                                 | $20 \times 10^{-6} \text{m}$                |
| Height of the constriction channel ( $h$ )                                | $30 \times 10^{-6} \text{m}$                |
| Width of the wide microchannel ( $w$ )                                    | $100 \times 10^{-6} \text{m}$               |
| Height of the wide microchannel ( $h$ )                                   | $30 \times 10^{-6} \text{m}$                |
| Inner diameter of the tubing ( $d$ )                                      | $3.8 \times 10^{-4} \text{m}$               |
| Approximate average shear stress in the constriction channel ( $\tau_c$ ) |                                             |
| 0.1 rpm                                                                   | $3.5 \text{ dyn/cm}^2$                      |
| 0.5 rpm                                                                   | $26.9 \text{ dyn/cm}^2$                     |
| 1.0 rpm                                                                   | $60.5 \text{ dyn/cm}^2$                     |
| Approximate average shear stress in the wide microchannel ( $\tau_w$ )    |                                             |
| 0.1 rpm                                                                   | $0.46 \text{ dyn/cm}^2$                     |
| 0.5 rpm                                                                   | $3.56 \text{ dyn/cm}^2$                     |
| 1.0 rpm                                                                   | $8 \text{ dyn/cm}^2$                        |
| Approximate average shear stress in the tubing ( $\tau_t$ )               |                                             |
| 0.1 rpm                                                                   | $0.0077 \text{ dyn/cm}^2$                   |
| 0.5 rpm                                                                   | $0.06 \text{ dyn/cm}^2$                     |
| 1.0 rpm                                                                   | $0.13 \text{ dyn/cm}^2$                     |

Note that  $\tau_c$  and  $\tau_w$  are calculated based on the equation  $\tau = \frac{\mu Q}{w^2 \times h}$ , whereas  $\tau_t$  is

calculated based on the equation  $\tau = \frac{32 \mu Q}{\pi d^3}$ .

Table S2. Primers for real-time PCR

| <b>Gene name</b>   | <b>Primers</b>         |
|--------------------|------------------------|
| $\beta$ -actin F   | AGAGCAAGAGAGGCATCCTC   |
| $\beta$ -actin R   | CTCAAACATGATCTGGGTCA   |
| $\beta$ -catenin F | AAAATGGCAGTGCGTTTAG    |
| $\beta$ -catenin R | TTTGAAGGCAGTCTGTGCGTA  |
| Bmi 1 F            | AGCAGAAATGCATCGAACAA   |
| Bmi 1 R            | CCTAACCAGATGAAGTTGCTGA |
| c-myc F            | ACAGCTACGGAACTCTTGTGC  |
| c-myc R            | GCCCAAAGTCCAATTTGAGGC  |
| GSK-3 $\beta$ F    | GGA ACTCCAACAAGGGAGCA  |
| GSK-3 $\beta$ R    | TTCGGGGTCGGAAGACCTTA   |
| P53 F              | CCCAAGCAATGGATGATTTGA  |
| P53 R              | GGCATTCTGGGAGCTTCATCT  |
